# Supplementary material for: Clinical characteristics and determinants of mortality in coronavirus disease 2019 (COVID-19) patients on an intensive care unit—a retrospective explorative 1-year all-comers study
Source: PubMed Central journal article supplement — J Thorac Dis. 2022 May;14(5):1319–31. doi: 10.21037/jtd-21-1713 (PMC9186226; doi:10.21037/jtd-21-1713), 2022-05
Supplement: jtd-14-05-1319-dss.pdf [file jtd-14-05-1319-dss.pdf]

## Data Sharing Statement

|                     |                                                                                                                                                    |                                                                                                                                         |
|---------------------|----------------------------------------------------------------------------------------------------------------------------------------------------|-----------------------------------------------------------------------------------------------------------------------------------------|
| <b>Article Info</b> | <a href="https://dx.doi.org/10.21037/jtd-21-1713">https://dx.doi.org/10.21037/jtd-21-1713</a>                                                      |                                                                                                                                         |
| <b>Item</b>         | <b>Question</b>                                                                                                                                    | <b>Authors' Response<br/>(place "-" if not applicable)</b>                                                                              |
| 1                   | Would you like to share data collected for your study to others?                                                                                   | Yes                                                                                                                                     |
| 2                   | If not, would you like to share the reason for your decision?                                                                                      | -                                                                                                                                       |
| 3                   | What data in particular will be shared?                                                                                                            | Any data reported in the study can be shared, especially survival data, time to intubation, blood gas analyses, and laboratory findings |
| 4                   | Any other documents will be share? Such as study protocol, statistical analysis plan, informed consent form, clinical study report, analytic code. | The statistical analysis plan and any additional original data as reported in the manuscript will also be shared upon request           |
|                     | When will data availability begin?                                                                                                                 | From the publication date                                                                                                               |
| 6                   | When will data availability end?                                                                                                                   | Three years within the publication date                                                                                                 |
| 7                   | To whom will you share the data?                                                                                                                   | Intensive care specialists and pneumologists with an interest in ventilation of COVID-19 patients                                       |
| 8                   | For what type of analysis or purpose?                                                                                                              | Especially outcome related to non-invasive ventilation and invasive mechanical ventilation in COVID-19 patients                         |
| 9                   | How or where can the data/documents be obtained?                                                                                                   | E-mails could be sent to the address below to obtain the shared data:<br>stefan.moehlenkamp@bethanienmoers.de                           |
| 10                  | Any other restrictions?                                                                                                                            | We may balance the potential benefits and risks for each request and then provide the data that could be shared.                        |
