# Supplementary material for: Clinical characteristics and determinants of mortality in coronavirus disease 2019 (COVID-19) patients on an intensive care unit—a retrospective explorative 1-year all-comers study
Source: PubMed Central journal article supplement — J Thorac Dis. 2022 May;14(5):1319–31. doi: 10.21037/jtd-21-1713 (PMC9186226; doi:10.21037/jtd-21-1713), 2022-05
Supplement: jtd-14-05-1319-supplementary.pdf [file jtd-14-05-1319-supplementary.pdf]

## Supplementary

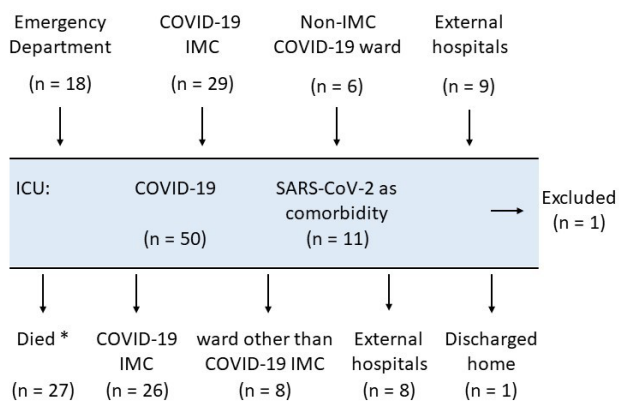

\*: including n = 6 who died on ECMO in external hospital and n = 3 who died on ward after discharge from ICU

**Figure S1** Admission and discharge of patients to and from ICU. One patient was excluded because the patient was transferred for weaning after survived COVID-19 infection. COVID-19, coronavirus disease 2019; ECMO, extracorporeal membrane oxygenation; ICU, intensive care unit; IMC, intermediate care unit.

**Table S1** Tabulation for converting oxygen insufflation to FiO<sub>2</sub> in patients on NIV using the “3% formula”: FiO<sub>2</sub> (%) = 21% + flow (L/min) × 3%. pO<sub>2</sub> was measured to calculate pO<sub>2</sub>/FiO<sub>2</sub> (Coudroy *et al.* 2020; Frat *et al.* 2015)

| Non-invasive ventilation (NIV) |                                |
|--------------------------------|--------------------------------|
| O <sub>2</sub> flow (L/min)    | Estimated FiO <sub>2</sub> (%) |
| 1                              | 24                             |
| 2                              | 27                             |
| 3                              | 30                             |
| 4                              | 33                             |
| 5                              | 36                             |
| 6                              | 39                             |
| 7                              | 42                             |
| 8                              | 45                             |
| 9                              | 48                             |
| 10                             | 51                             |
| 11                             | 54                             |
| 12                             | 57                             |
| 13                             | 60                             |
| 14                             | 63                             |
| 15                             | 66                             |

FiO<sub>2</sub>, inspiratory oxygen fraction; pO<sub>2</sub>, partial pressure of oxygen.

**Table S2** Tabulation for converting oxygen insufflation to FiO<sub>2</sub> in patients on nasal cannula (Marx R *et al.* 2013; DSG: <https://www.sepsis-gesellschaft.de/sepsisdefinition-und-kodierung/>)

| Nasal cannula               |                                |
|-----------------------------|--------------------------------|
| O <sub>2</sub> flow (L/min) | Estimated FiO <sub>2</sub> (%) |
| 1                           | 24                             |
| 2                           | 28                             |
| 3                           | 32                             |
| 4                           | 36                             |
| 5                           | 40                             |
| 6                           | 44                             |

DSG, Deutsche Sepsis Gesellschaft; FiO<sub>2</sub>, inspiratory oxygen fraction.

**Table S3** Tabulation to estimate pO<sub>2</sub> from O<sub>2</sub> saturation (SO<sub>2</sub>) (Marx R *et al.* 2013; DSG: <https://www.sepsis-gesellschaft.de/sepsisdefinition-und-kodierung/>)

| SO <sub>2</sub> (%) | Estimated pO <sub>2</sub> (mmHg) |
|---------------------|----------------------------------|
| 80                  | 44                               |
| 81                  | 45                               |
| 82                  | 46                               |
| 83                  | 47                               |
| 84                  | 49                               |
| 85                  | 50                               |
| 86                  | 52                               |
| 87                  | 53                               |
| 88                  | 55                               |
| 89                  | 57                               |
| 90                  | 60                               |
| 91                  | 62                               |
| 92                  | 65                               |
| 93                  | 69                               |
| 94                  | 73                               |
| 95                  | 79                               |
| 96                  | 86                               |
| 97                  | 96                               |
| 98                  | 112                              |
| 99                  | 145                              |

DSG, Deutsche Sepsis Gesellschaft.

**Table S4** List of diagnoses established prior to ICU admission in COVID-19 (n=50)

| Diagnoses                                           | Percentage |
|-----------------------------------------------------|------------|
| Atrial fibrillation                                 | 26%        |
| Obstructive sleep apnea syndrome (OSAS)             | 18%        |
| Psychiatric and/or neurological diseases            | 18%        |
| Malignancies/tumor                                  | 6%         |
| Liver steatosis and/or cirrhosis                    | 4%         |
| Deep vein thrombosis (DVT) and/or pulmonary embolus | 4%         |
| Peptic ulcer                                        | 4%         |
| Pituitary insufficiency                             | 2%         |
| Systemic lupus erythematosus                        | 2%         |

COVID-19, coronavirus disease 2019; ICU, intensive care unit.
